# Supplementary material
Source: publisher figshare collection journal article supplement (https://tandf.figshare.com/articles/dataset/_/21676656)
Supplement: Supplementary file 1 [file 38432145]

## Supplementary materials

### Two new cytochalasins from the endophytic fungus *Xylaria* sp.

#### GDGJ-77B

Zhao-Long Xu <sup>a, b#</sup>, Ben-Chao Li <sup>a#</sup>, Li-Li Huang <sup>a</sup>, Liu-Xia Lv <sup>a</sup>, Yan Luo <sup>c,\*</sup>,  
Wei-Feng Xu <sup>a</sup>, Rui-Yun Yang <sup>a,\*</sup>

<sup>a</sup> State Key Laboratory for Chemistry and Molecular Engineering of Medicinal Resources, College of Chemistry and Pharmaceutical Sciences, Collaborative Innovation Center for Guangxi Ethnic Medicine, Guangxi Normal University, Guilin, P. R. China;

<sup>b</sup> Guangxi Research Institute of Chemical Industry Co., Ltd., Nanning, P. R. China;

<sup>c</sup> Life Science Institute, Guangxi Medical University, Nanning, P. R. China.

#### Corresponding Author

\*E-mail: R.-Y. Yang, yang\_rui\_yun@163.com; Y. Luo, luoyan2007@163.com

#### Author Contributions

# These authors contributed equally to this work.

**ABSTRACT:** Two new open-chain cytochalasins, xylarchalasin A and B (**1** and **2**), together with six known analogues (**3–8**), were isolated from the endophytic fungus *Xylaria* sp. GDGJ-77B from the Chinese medicinal plant *Sophora tonkinensis*. Their structures were elucidated on the basis of comprehensive spectroscopic analysis. Compound **2** displayed moderate antibacterial activities against *Bacillus subtilis* and *Escherichia coli* with MIC values of 25 and 12.5  $\mu\text{g/mL}$ , respectively.

**KEYWORDS:** *Xylaria* sp.; endophytic fungus; cytochalasins; antibacterial activities

## List of supporting information

**Table S1.**  $^1\text{H}$  NMR and  $^{13}\text{C}$  NMR data for compounds **1** and **2** in  $\text{CDCl}_3$

**Table S2.** Antibacterial activities of compounds **1-8**

**Figure S1.** Key HMBC and  $^1\text{H}$ - $^1\text{H}$  COSY correlations of compounds **1** and **2**

**Figure S2.** Experimental CD spectra of compounds **1-3** in MeOH

**Figure S3.** Key NOESY correlations of compound **1**

**Figure S4.** HRESIMS spectrum of compound **1**

**Figure S5.**  $^1\text{H}$  NMR (400 MHz,  $\text{CDCl}_3$ ) spectrum of compound **1**

**Figure S6.**  $^{13}\text{C}$  NMR (100 MHz,  $\text{CDCl}_3$ ) spectrum of compound **1**

**Figure S7.**  $^1\text{H}$ - $^1\text{H}$  COSY ( $\text{CDCl}_3$ ) spectrum of compound **1**

**Figure S8.** HMQC ( $\text{CDCl}_3$ ) spectrum of compound **1**

**Figure S9.** HMBC ( $\text{CDCl}_3$ ) spectrum of compound **1**

**Figure S10.** NOESY ( $\text{CDCl}_3$ ) spectrum of compound **1**

**Figure S11.** HRESIMS spectrum of compound **2**

**Figure S12.**  $^1\text{H}$  NMR (600 MHz,  $\text{CDCl}_3$ ) spectrum of compound **2**

**Figure S13.**  $^{13}\text{C}$  NMR (150 MHz,  $\text{CDCl}_3$ ) spectrum of compound **2**

**Figure S14.**  $^1\text{H}$ - $^1\text{H}$  COSY ( $\text{CDCl}_3$ ) spectrum of compound **2**

**Figure S15.** HMQC ( $\text{CDCl}_3$ ) spectrum of compound **2**

**Figure S16.** HMBC ( $\text{CDCl}_3$ ) spectrum of compound **2**

**Figure S17.** NOESY ( $\text{CDCl}_3$ ) spectrum of compound **2**

**Figure S18.**  $^1\text{H}$  NMR (400 MHz,  $\text{CD}_3\text{OD}$ ) spectrum of compound **3**

**Figure S19.**  $^{13}\text{C}$  NMR (100 MHz,  $\text{CD}_3\text{OD}$ ) spectrum of compound **3**

**Table S1.**  $^1\text{H}$  and  $^{13}\text{C}$  NMR assignments for compounds **1** and **2** in  $\text{CDCl}_3$ 

| no.                 | <b>1</b> <sup>a</sup> |                               | <b>2</b> <sup>b</sup> |                               |
|---------------------|-----------------------|-------------------------------|-----------------------|-------------------------------|
|                     | $\delta_{\text{C}}$   | $\delta_{\text{H}}$ (J in Hz) | $\delta_{\text{C}}$   | $\delta_{\text{H}}$ (J in Hz) |
| 1                   | 171.2                 |                               | 171.0                 |                               |
| 3                   | 54.6                  | 3.60, m                       | 54.4                  | 3.64, m                       |
| 4                   | 49.9                  | 2.56, t (4.4)                 | 50.2                  | 2.59, t (4.3)                 |
| 5                   | 35.6                  | 2.14, m                       | 35.7                  | 2.15, m                       |
| 6                   | 57.6                  |                               | 57.6                  |                               |
| 7                   | 60.0                  | 2.74, m                       | 60.0                  | 2.73, d (5.0)                 |
| 8                   | 47.3                  | 2.73, m                       | 47.3                  | 2.76, m                       |
| 9                   | 85.0                  |                               | 84.9                  |                               |
| 10 $\alpha$         | 43.0                  | 2.81, dd (13.4, 4.7)          | 44.0                  | 2.88, dd (13.4, 4.4)          |
| 10 $\beta$          |                       | 2.91, dd (13.4, 9.3)          |                       | 2.97, dd (13.4, 9.6)          |
| 11                  | 14.1                  | 1.12, d (6.9)                 | 14.1                  | 1.14, d (7.8)                 |
| 12                  | 20.6                  | 1.30, s                       | 20.5                  | 1.31, s                       |
| 13                  | 127.8                 | 5.92, m                       | 127.9                 | 5.96, m                       |
| 14                  | 131.5                 | 5.54, m                       | 130.9                 | 5.54, m                       |
| 15 $\alpha$         | 36.8                  | 2.14, m                       | 36.4                  | 2.17, m                       |
| 15 $\beta$          |                       | 2.41, m                       |                       | 2.45, m                       |
| 16                  | 39.8                  | 3.24, m                       | 41.1                  | 3.24, m                       |
| 17                  | 216.5                 |                               | 206.7                 |                               |
| 18                  | 78.1                  |                               | 152.2                 |                               |
| 19 $\alpha$         | 51.4                  | 2.62, d (17.0)                | 131.8                 | 6.53, dq (7.2, 1.2)           |
| 19 $\beta$          |                       | 3.06, d (17.0)                |                       |                               |
| 20                  | 202.3                 | 9.74, s                       | 192.9                 | 10.25, d (7.2)                |
| 21                  | 154.0                 |                               | 154.0                 |                               |
| 22                  | 18.1                  | 1.11, d (6.9)                 | 16.9                  | 1.11, d (6.6)                 |
| 23                  | 24.7                  | 1.34, s                       | 12.8                  | 2.25, d (1.2)                 |
| 24                  | 55.0                  | 3.78, s                       | 55.1                  | 3.80, s                       |
| 1'                  | 129.4                 |                               | 137.5                 |                               |
| 2', 6'              | 130.3                 | 7.11, d (8.4)                 | 129.2                 | 7.20, d (7.2)                 |
| 3', 5'              | 114.6                 | 6.86, d (8.4)                 | 129.2                 | 7.35, t (7.2)                 |
| 4'                  | 158.9                 |                               | 127.4                 | 7.28, t (7.2)                 |
| 4'-OCH <sub>3</sub> | 55.4                  | 3.79, s                       |                       |                               |
| 18-OH               |                       | 4.09, s                       |                       |                               |
| -NH                 |                       | 5.87, br s                    |                       | 5.72, br s                    |

<sup>a</sup>  $^1\text{H}$  NMR measured at 400 MHz;  $^{13}\text{C}$  NMR measured at 100 MHz.  
<sup>b</sup>  $^1\text{H}$  NMR measured at 600 MHz;  $^{13}\text{C}$  NMR measured at 150 MHz.

**Table S2.** Antibacterial activities of compounds **1–8** (MIC,  $\mu\text{g}\cdot\text{mL}^{-1}$ )<sup>a</sup>

| Compounds         | MIC ( $\mu\text{g}/\text{mL}$ )   |                           |                          |                            |                              |                         |                             |
|-------------------|-----------------------------------|---------------------------|--------------------------|----------------------------|------------------------------|-------------------------|-----------------------------|
|                   | <i>Bacillus paratyphosus</i><br>B | <i>Bacillus anthracis</i> | <i>Bacillus subtilis</i> | <i>Bacillus megaterium</i> | <i>Staphylococcus aureus</i> | <i>Escherichia coli</i> | <i>Shigella dysenteriae</i> |
| <b>1</b>          | >100                              | 50                        | 100                      | 25                         | 100                          | 50                      | >100                        |
| <b>2</b>          | 100                               | 50                        | 25                       | 50                         | 50                           | 12.5                    | 100                         |
| <b>3</b>          | 50                                | 25                        | 100                      | 50                         | >100                         | 50                      | >100                        |
| <b>4</b>          | 50                                | 100                       | 50                       | >100                       | 50                           | 25                      | 100                         |
| <b>5</b>          | >100                              | 25                        | 50                       | >100                       | 12.5                         | 50                      | 100                         |
| <b>6</b>          | 100                               | 50                        | 25                       | >100                       | 50                           | >100                    | 50                          |
| <b>7</b>          | >100                              | >100                      | 50                       | 50                         | >100                         | 100                     | 100                         |
| <b>8</b>          | 50                                | 50                        | 100                      | 100                        | 50                           | >100                    | >100                        |
| <b>Ampicillin</b> | 6.25                              | 3.125                     | 1.56                     | 1.56                       | 3.125                        | 1.56                    | 1.56                        |

<sup>a</sup> MIC-minimum inhibitory concentrations.

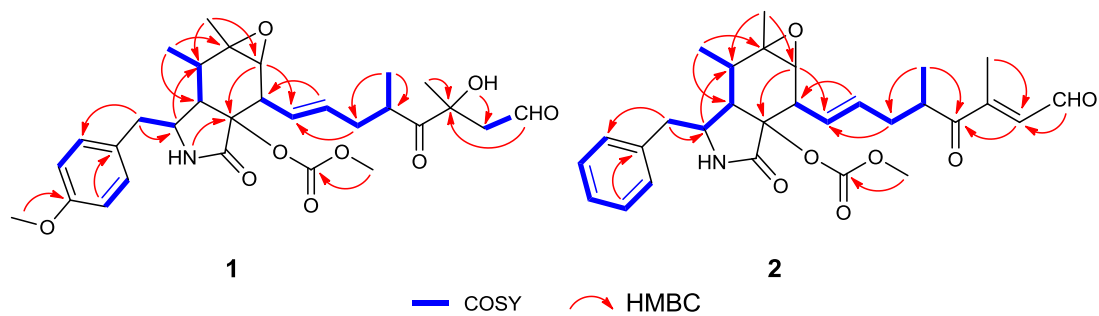

**Figure S1.** Key HMBC and  $^1\text{H}$ - $^1\text{H}$  COSY correlations of compounds **1** and **2**

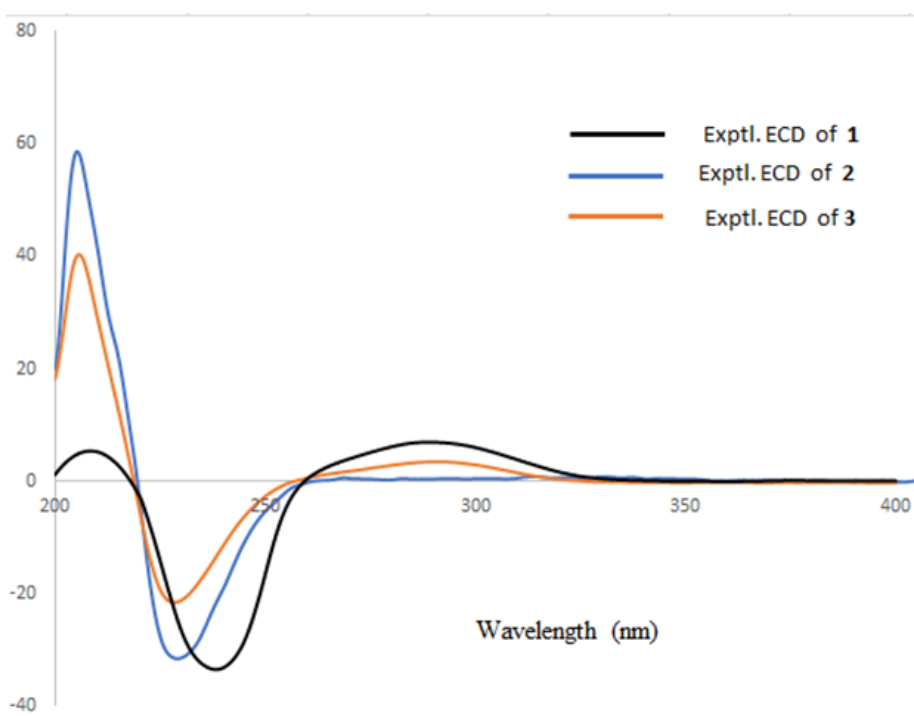

**Figure S2.** Experimental CD spectra of compounds **1–3** in MeOH

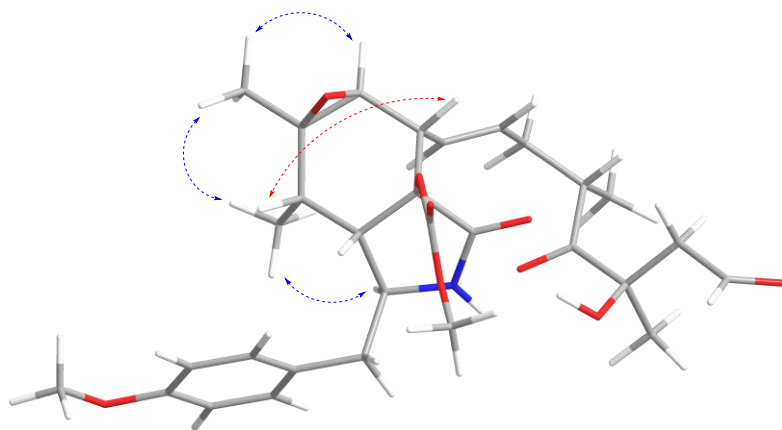

**Figure S3.** Key NOESY correlations of compound **1**

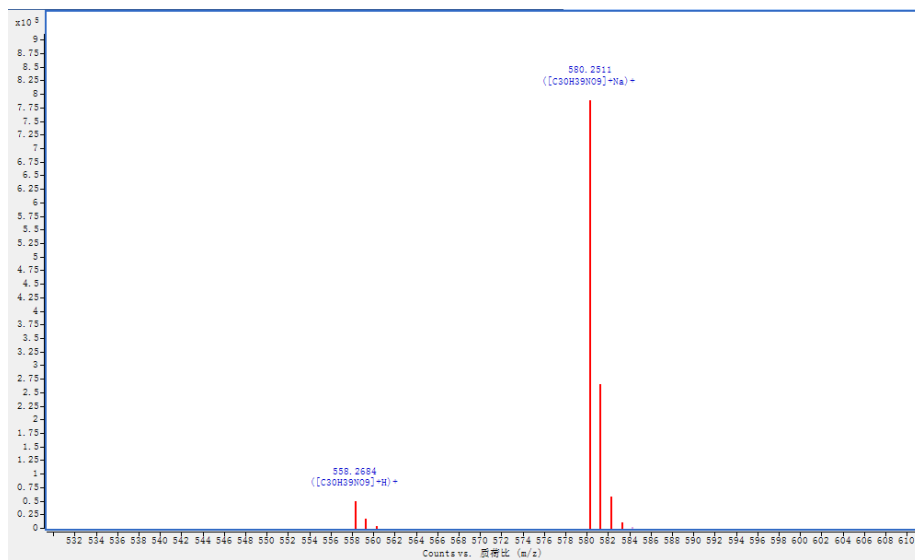

**Figure S4.** HR-ESI-MS spectrum of compound **1**

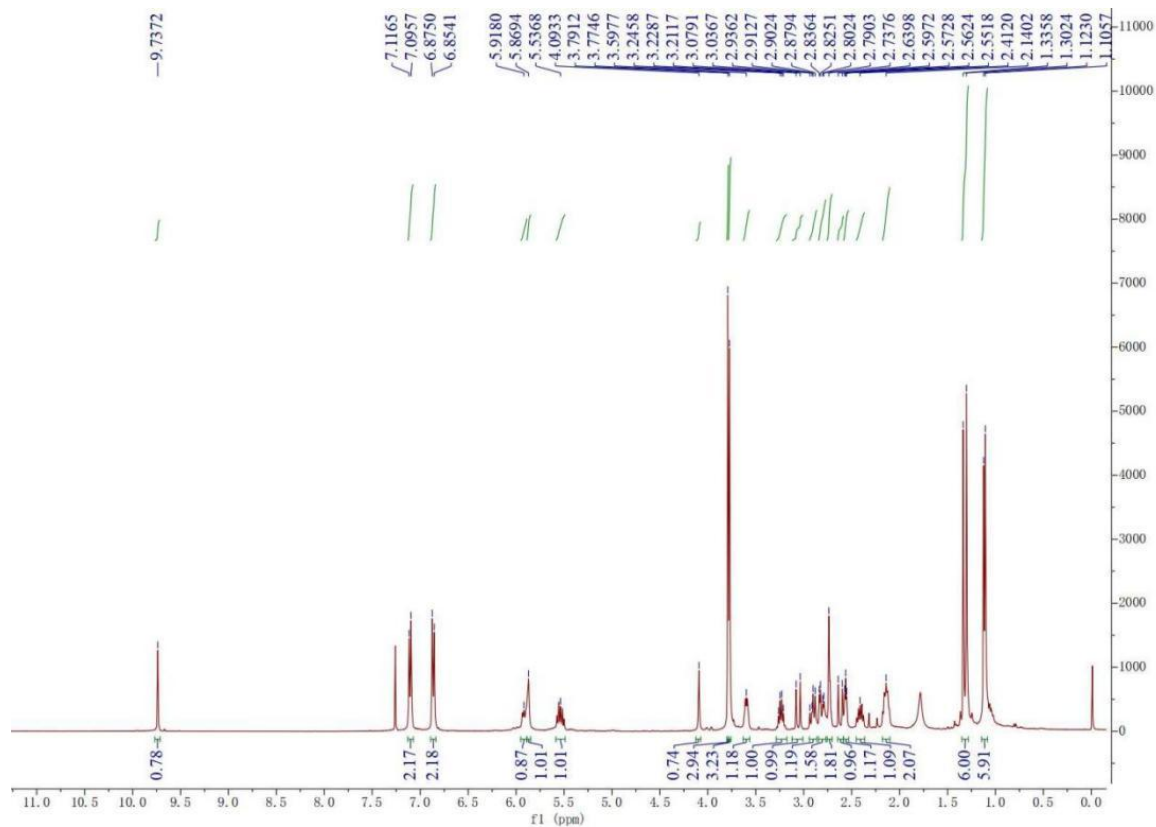

**Figure S5.**  $^1\text{H}$  NMR (400 MHz,  $\text{CDCl}_3$ ) spectrum of compound **1**

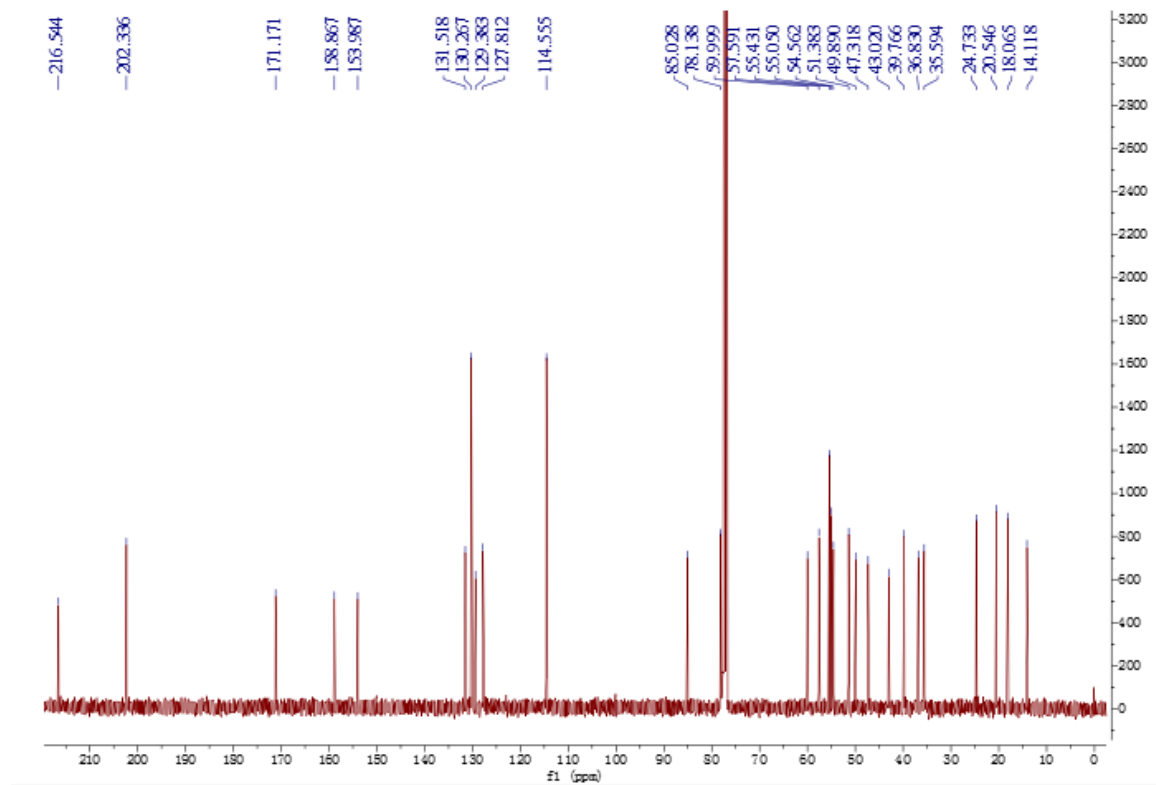

**Figure S6.**  $^{13}\text{C}$  NMR (100 MHz,  $\text{CDCl}_3$ ) spectrum of compound **1**



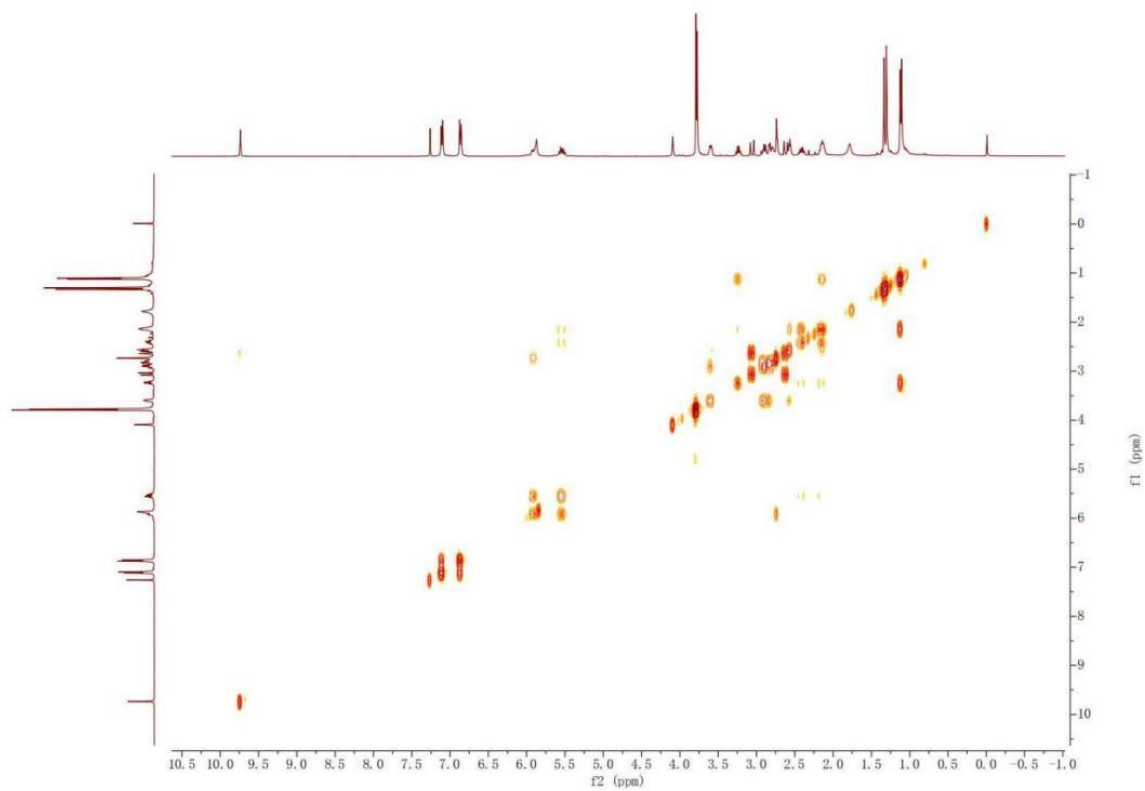

**Figure S7.**  $^1\text{H}$ - $^1\text{H}$  COSY ( $\text{CDCl}_3$ ) spectrum of compound **1**

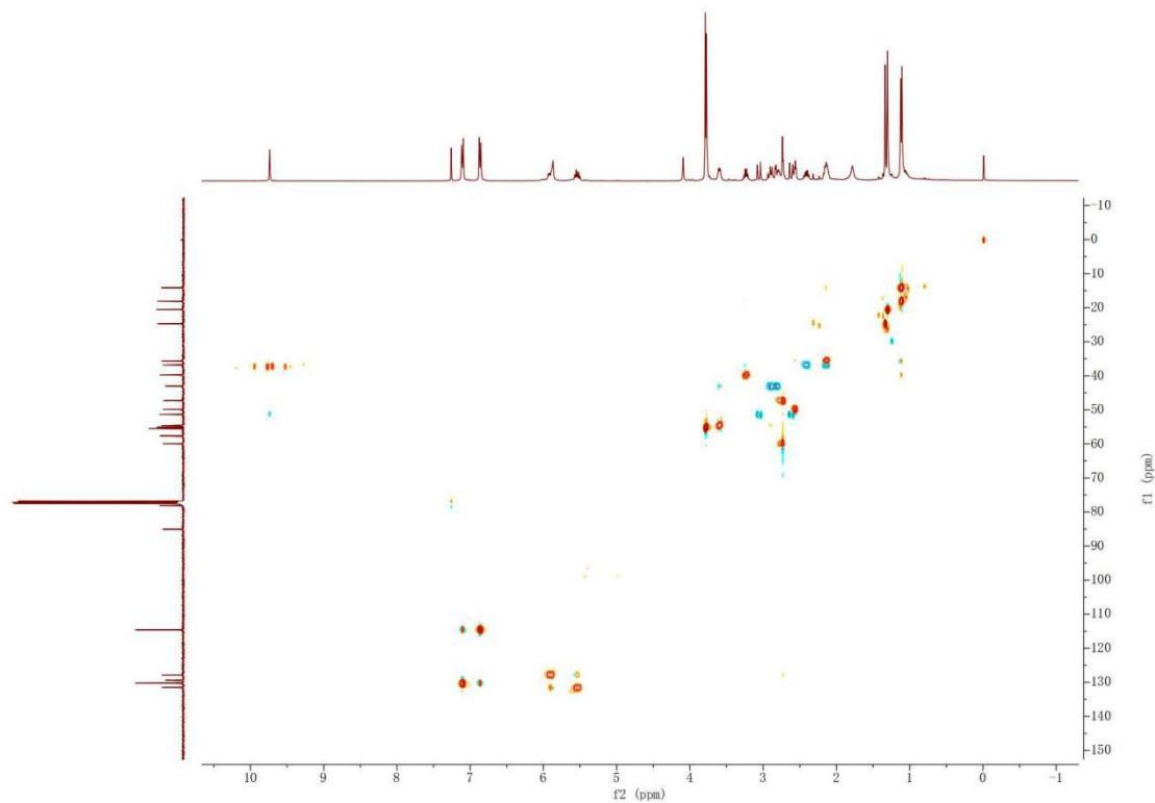

**Figure S8.** HMQC ( $\text{CDCl}_3$ ) spectrum of compound **1**

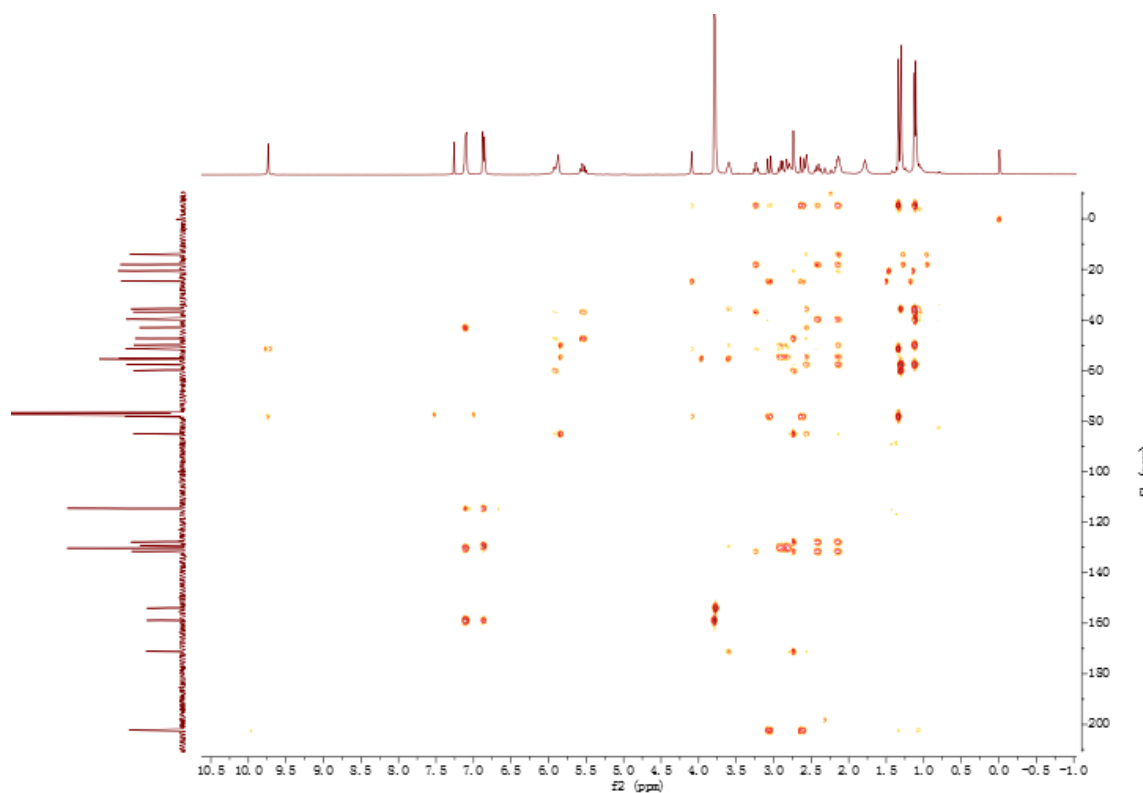

**Figure S9.** HMBC (CDCl<sub>3</sub>) spectrum of compound **1**

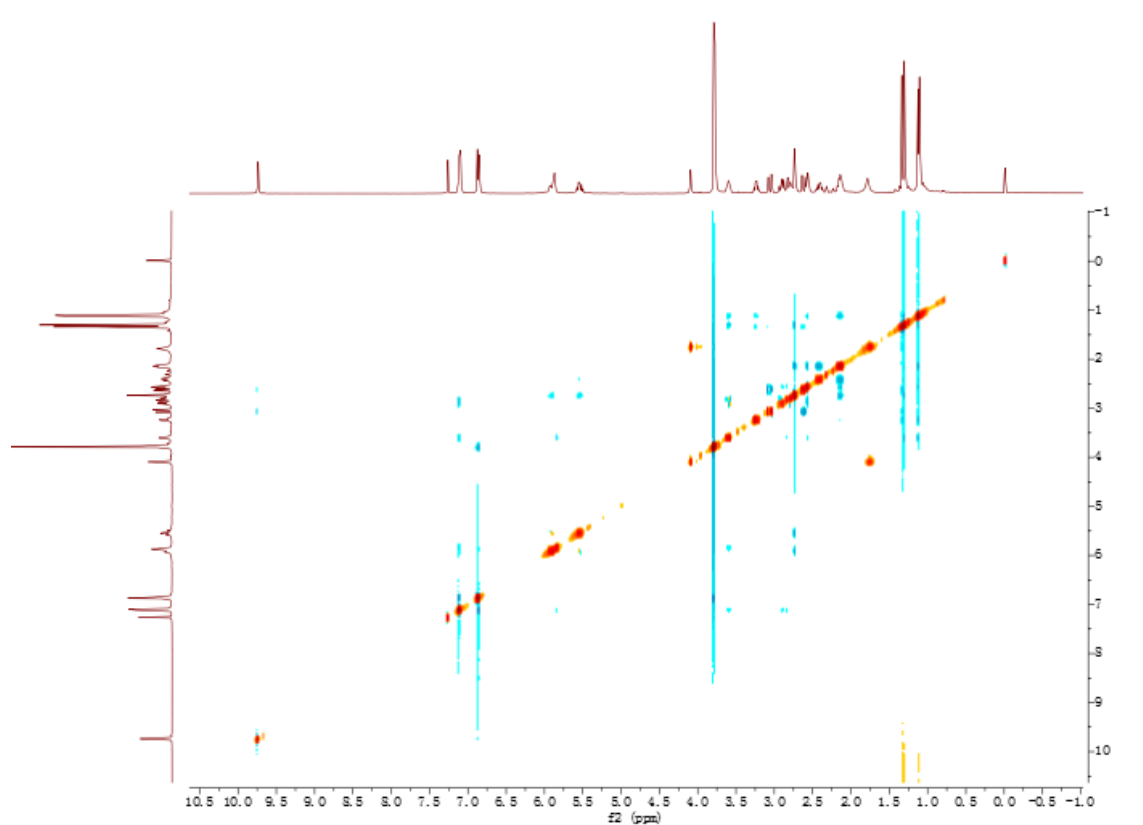

**Figure S10.** NOESY (CDCl<sub>3</sub>) spectrum of compound **1**

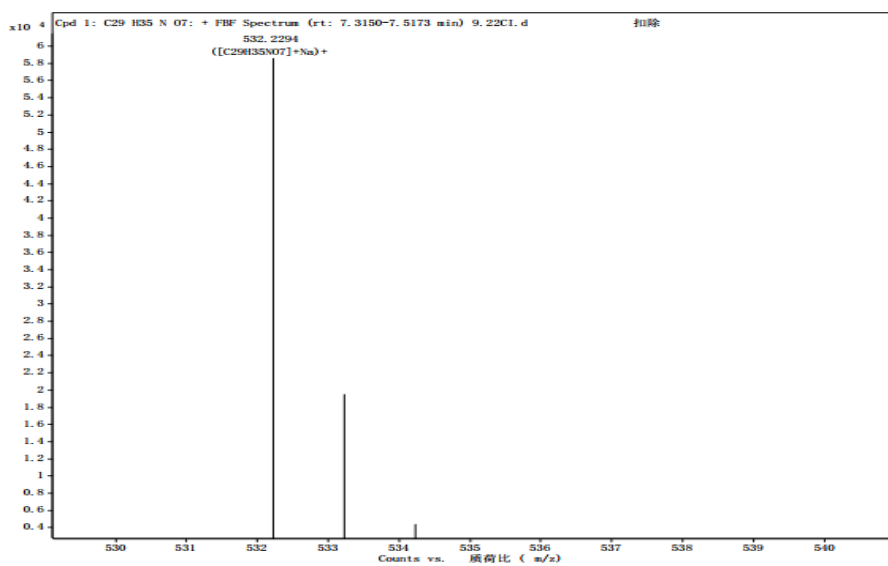

Figure S11. HR-ESI-MS spectrum of compound 2

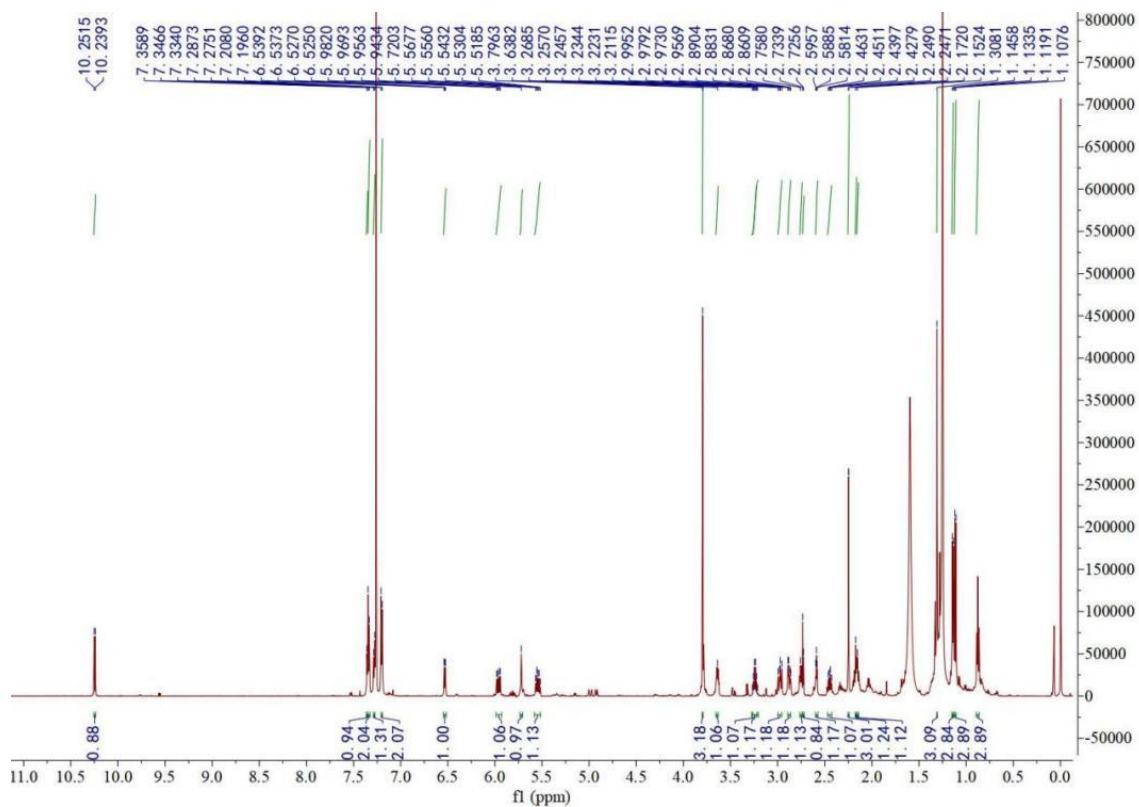

Figure S12. <sup>1</sup>H NMR (600 MHz, CDCl<sub>3</sub>) spectrum of compound 2

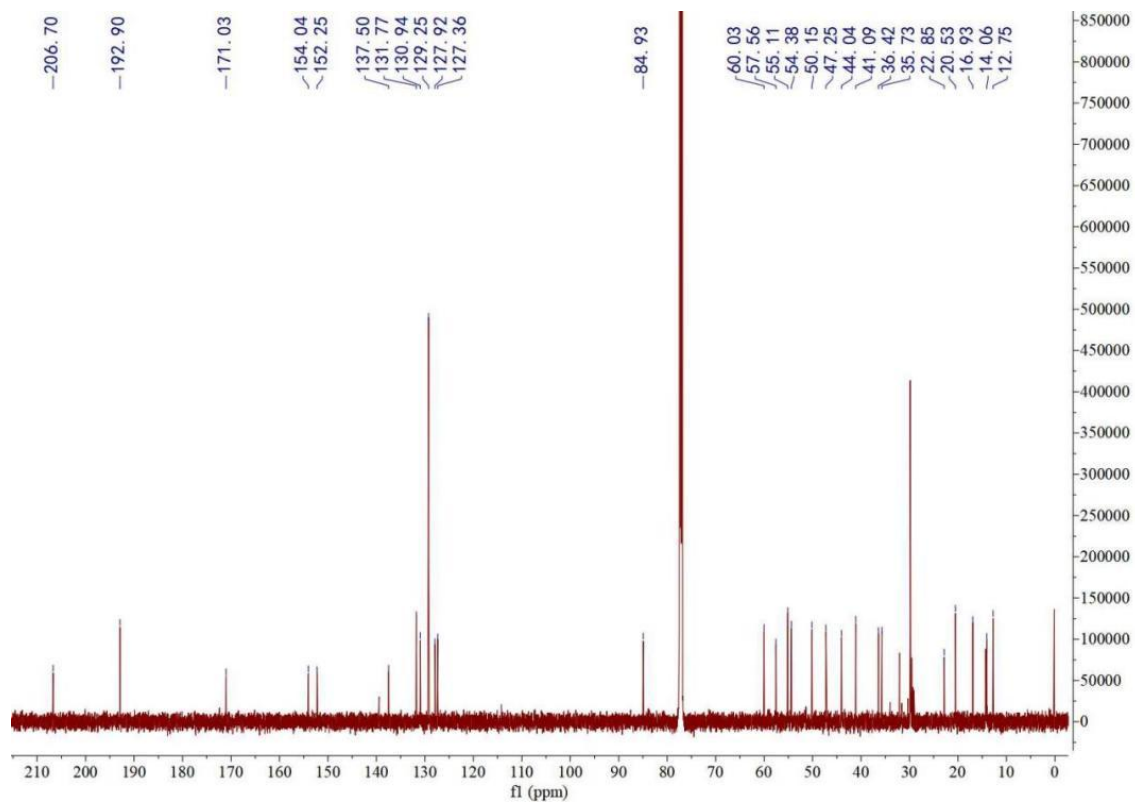

**Figure S13.**  $^{13}\text{C}$  NMR (150 MHz,  $\text{CDCl}_3$ ) spectrum of compound **2**

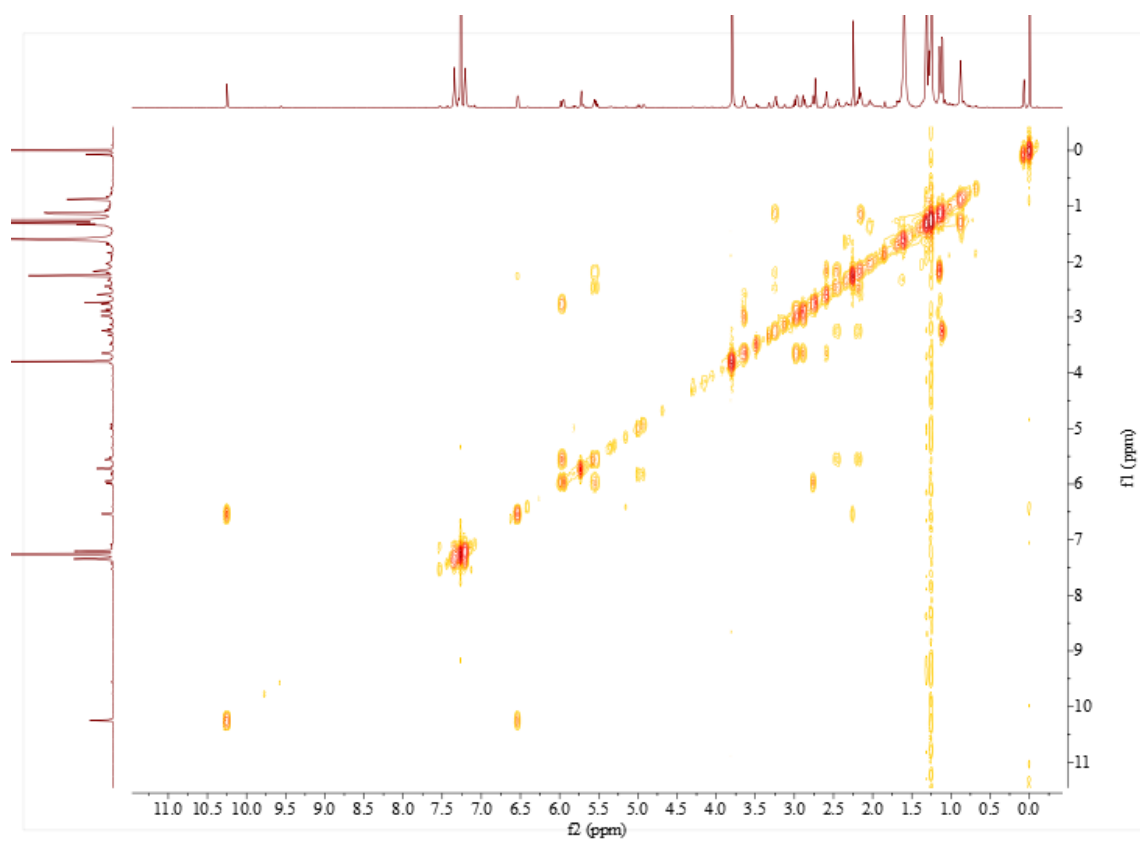

**Figure S14.**  $^1\text{H}$ - $^1\text{H}$  COSY ( $\text{CDCl}_3$ ) spectrum of compound **2**

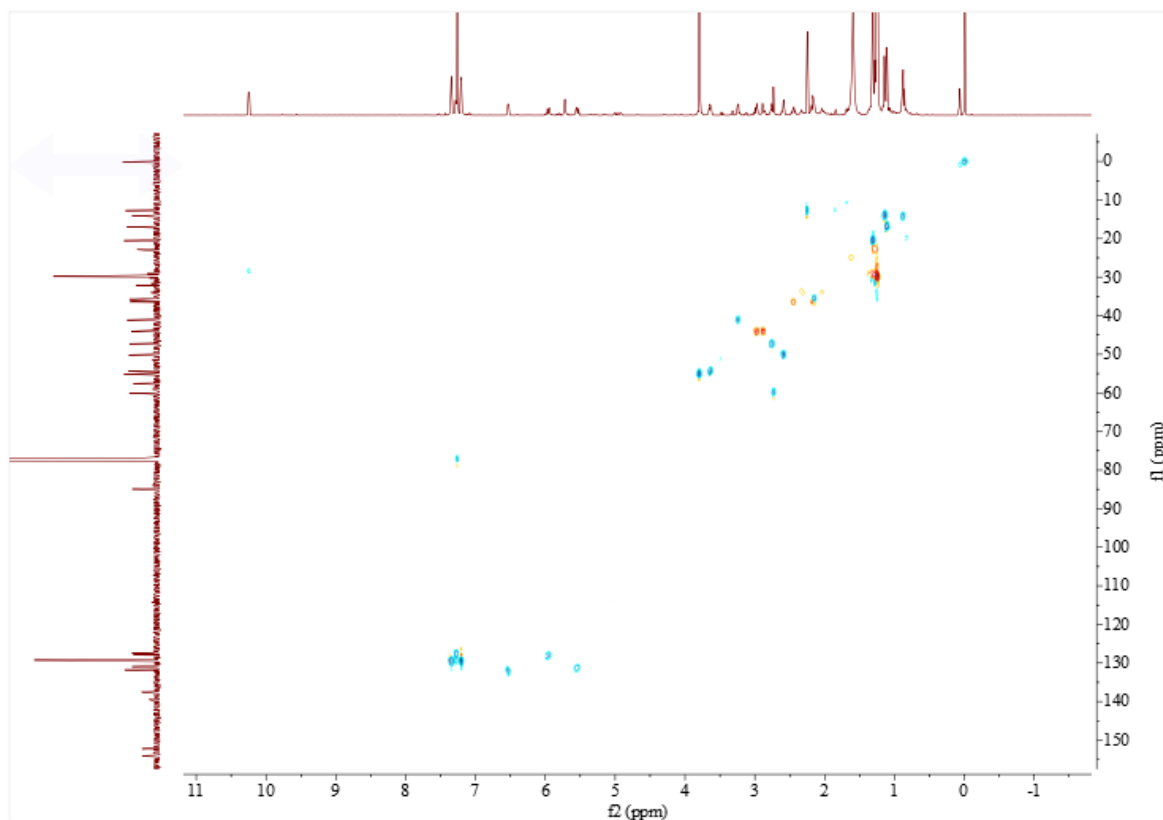

Figure S15. HMQC (CDCl<sub>3</sub>) spectrum of compound 2

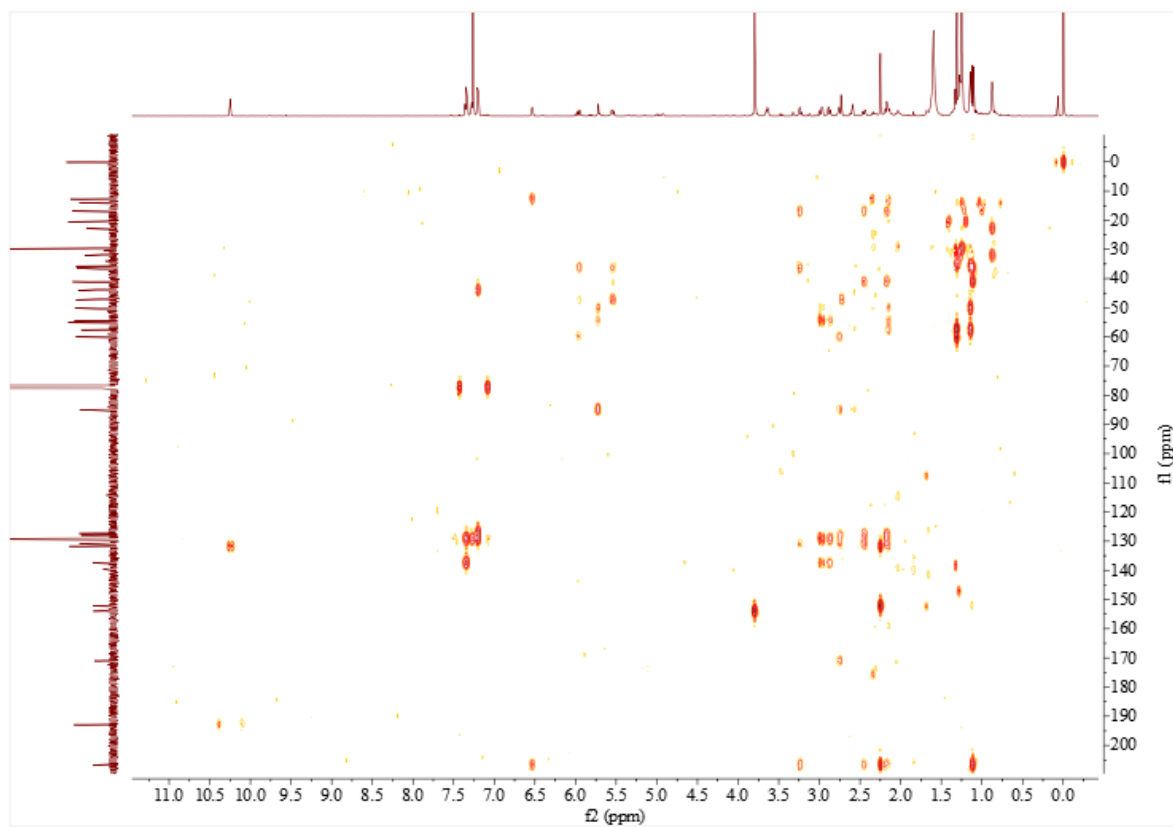

Figure S16. HMBC (CDCl<sub>3</sub>) spectrum of compound 2

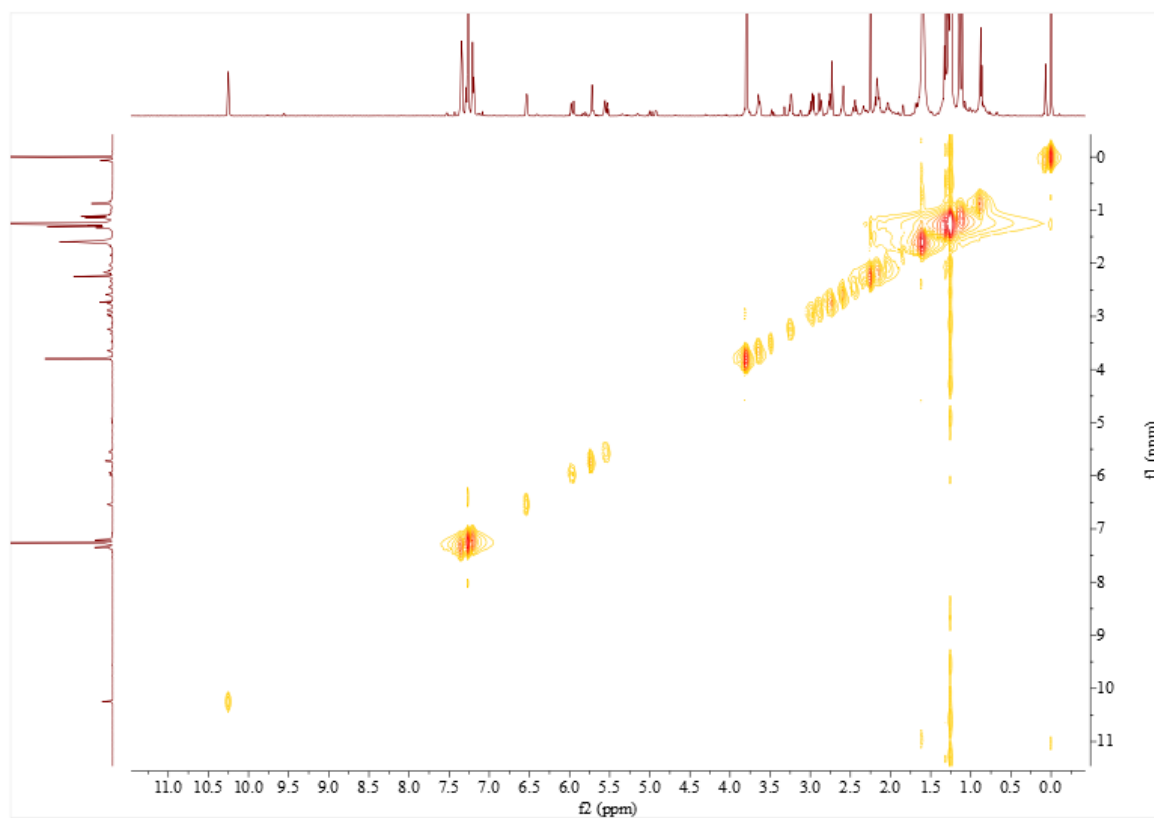

Figure S17. NOESY (CDCl<sub>3</sub>) spectrum of compound 2

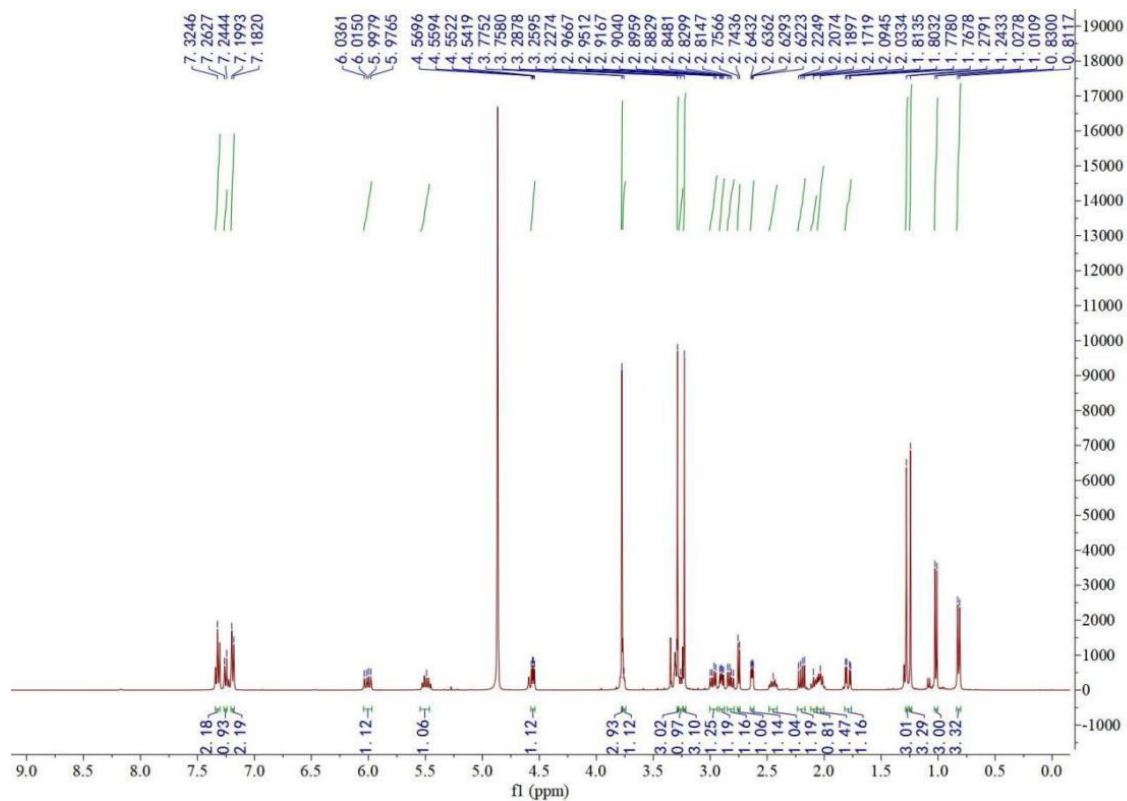

**Figure S18.**  $^1\text{H}$  NMR (400 MHz,  $\text{CD}_3\text{OD}$ ) spectrum of compound **3**

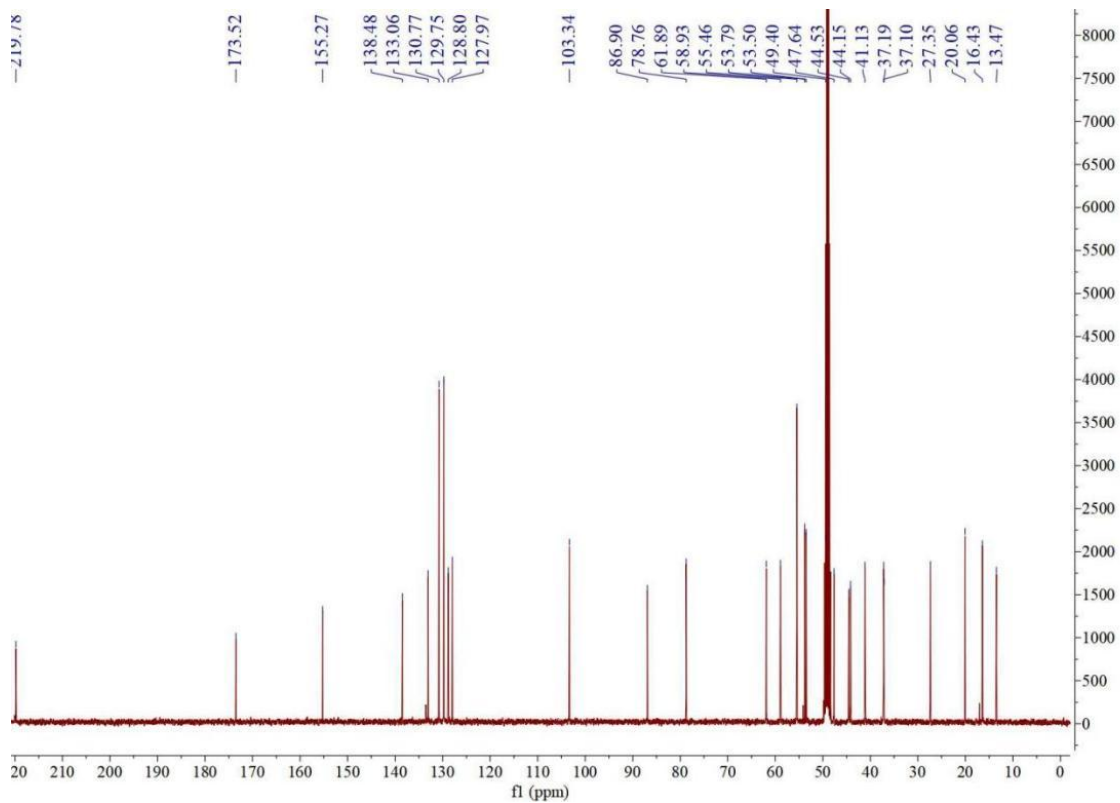

**Figure S19.**  $^{13}\text{C}$  NMR (100 MHz,  $\text{CD}_3\text{OD}$ ) spectrum of compound **3**
